# Supplementary material
Source: HighWire-hosted journal article supplement (https://msystems.asm.org/content/2/2/e00165-16)

**A) ArgE, Group I**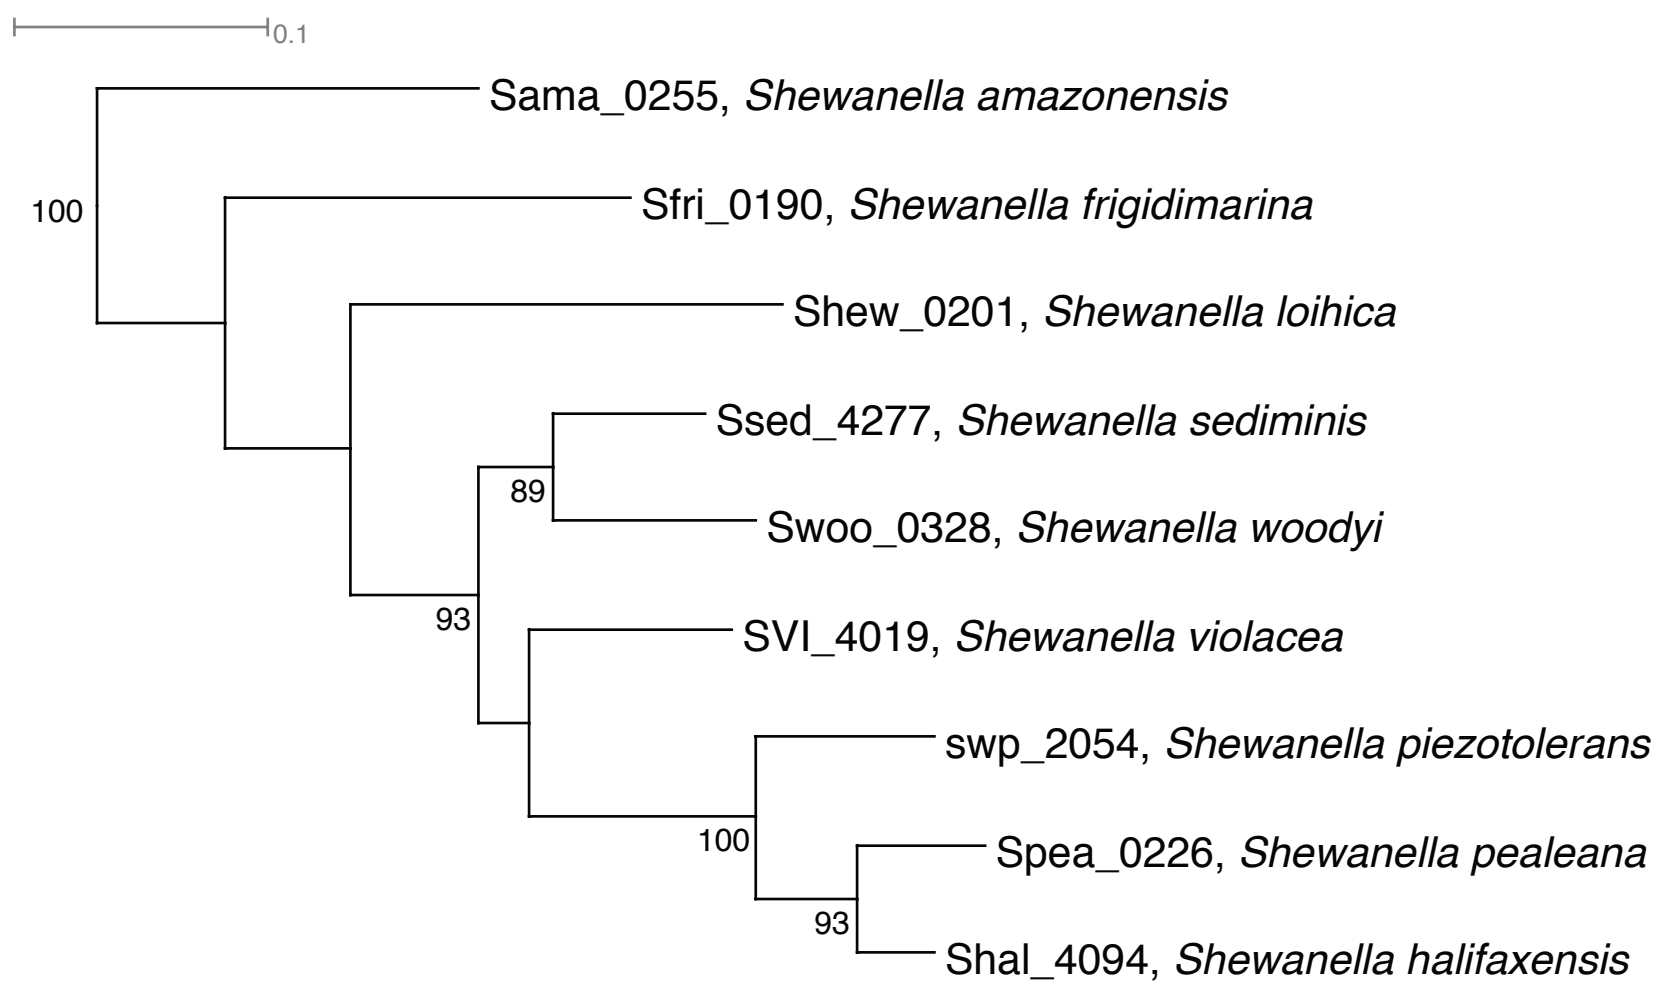**C) NagB, Group I**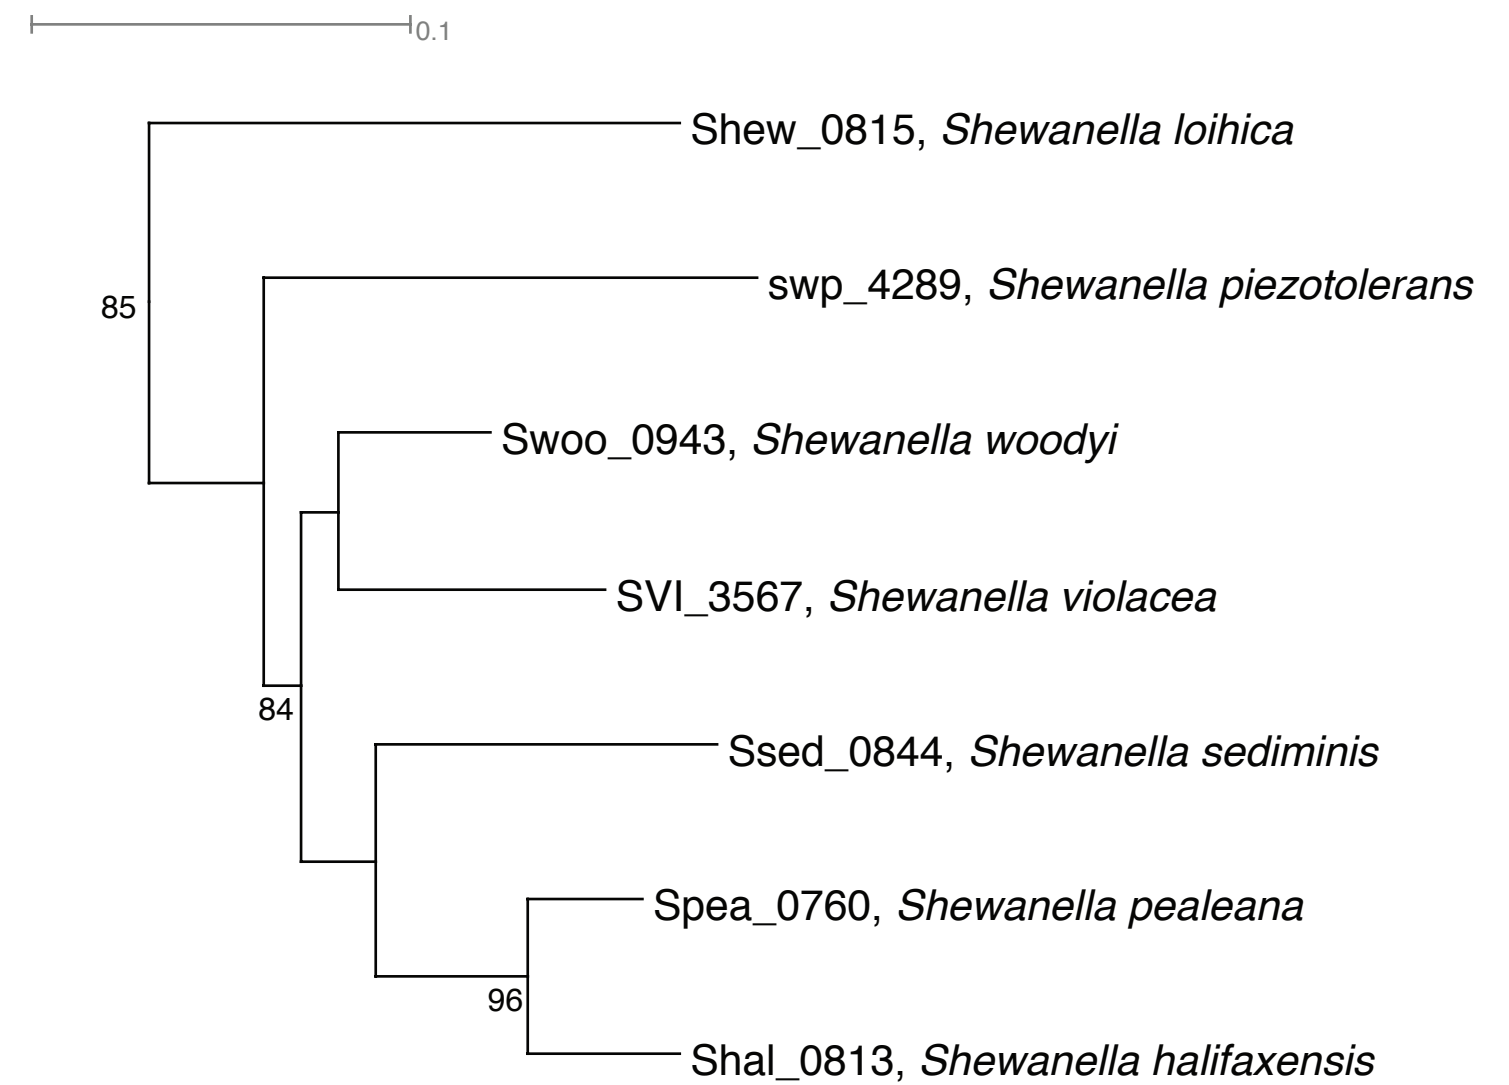**B) ArgE, Group II**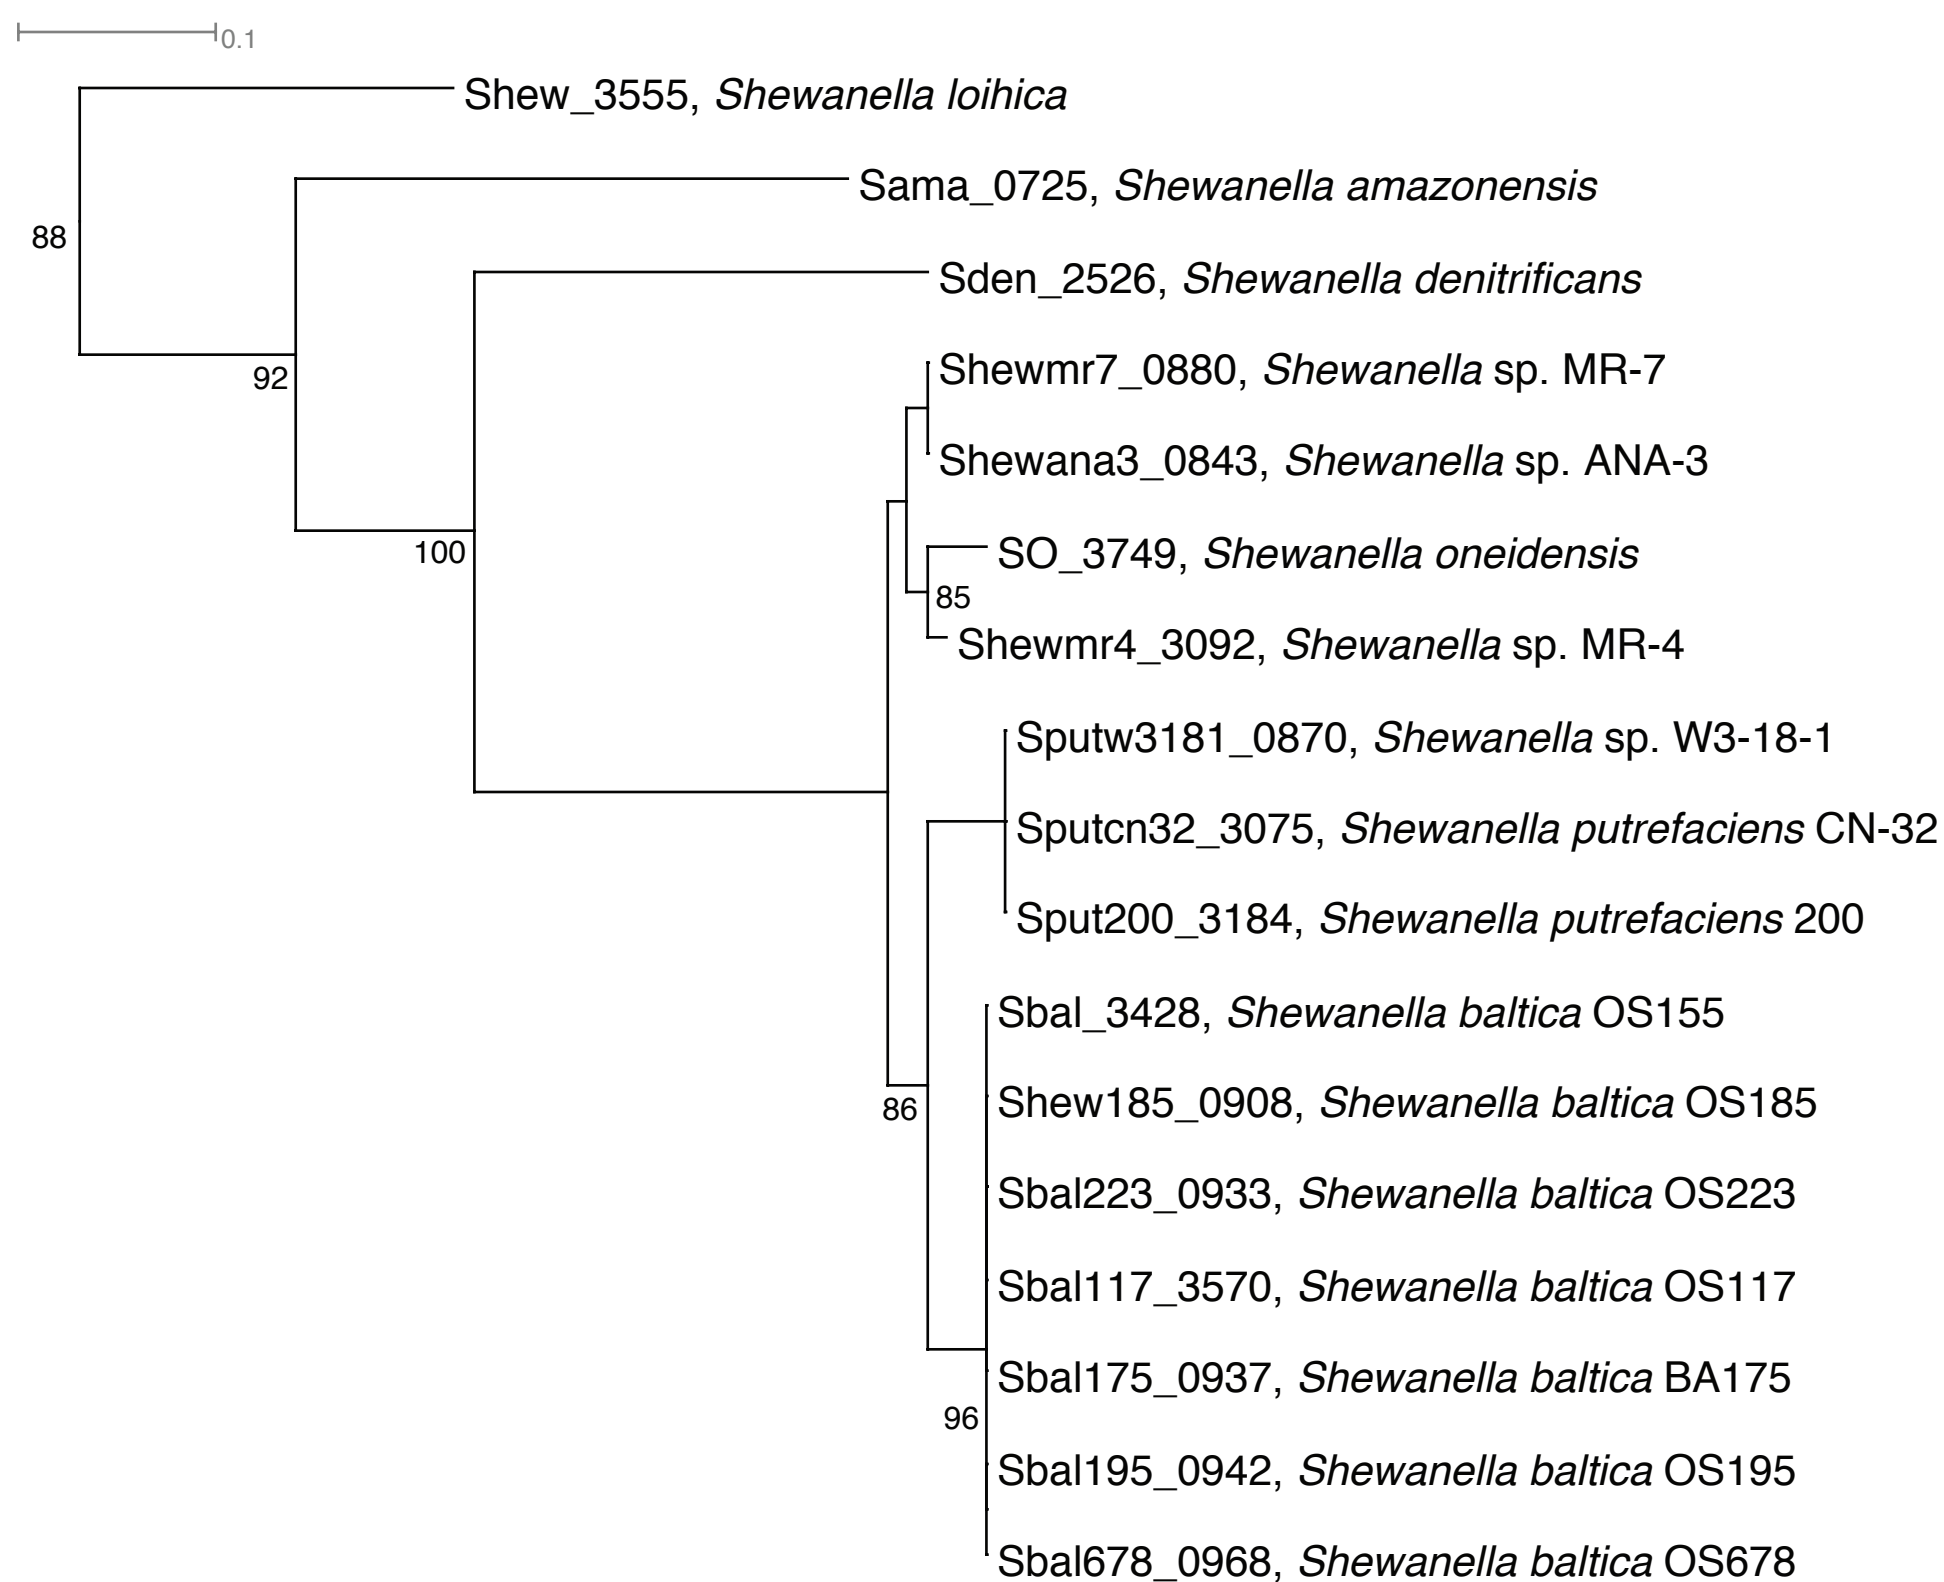**D) NagB, Group II**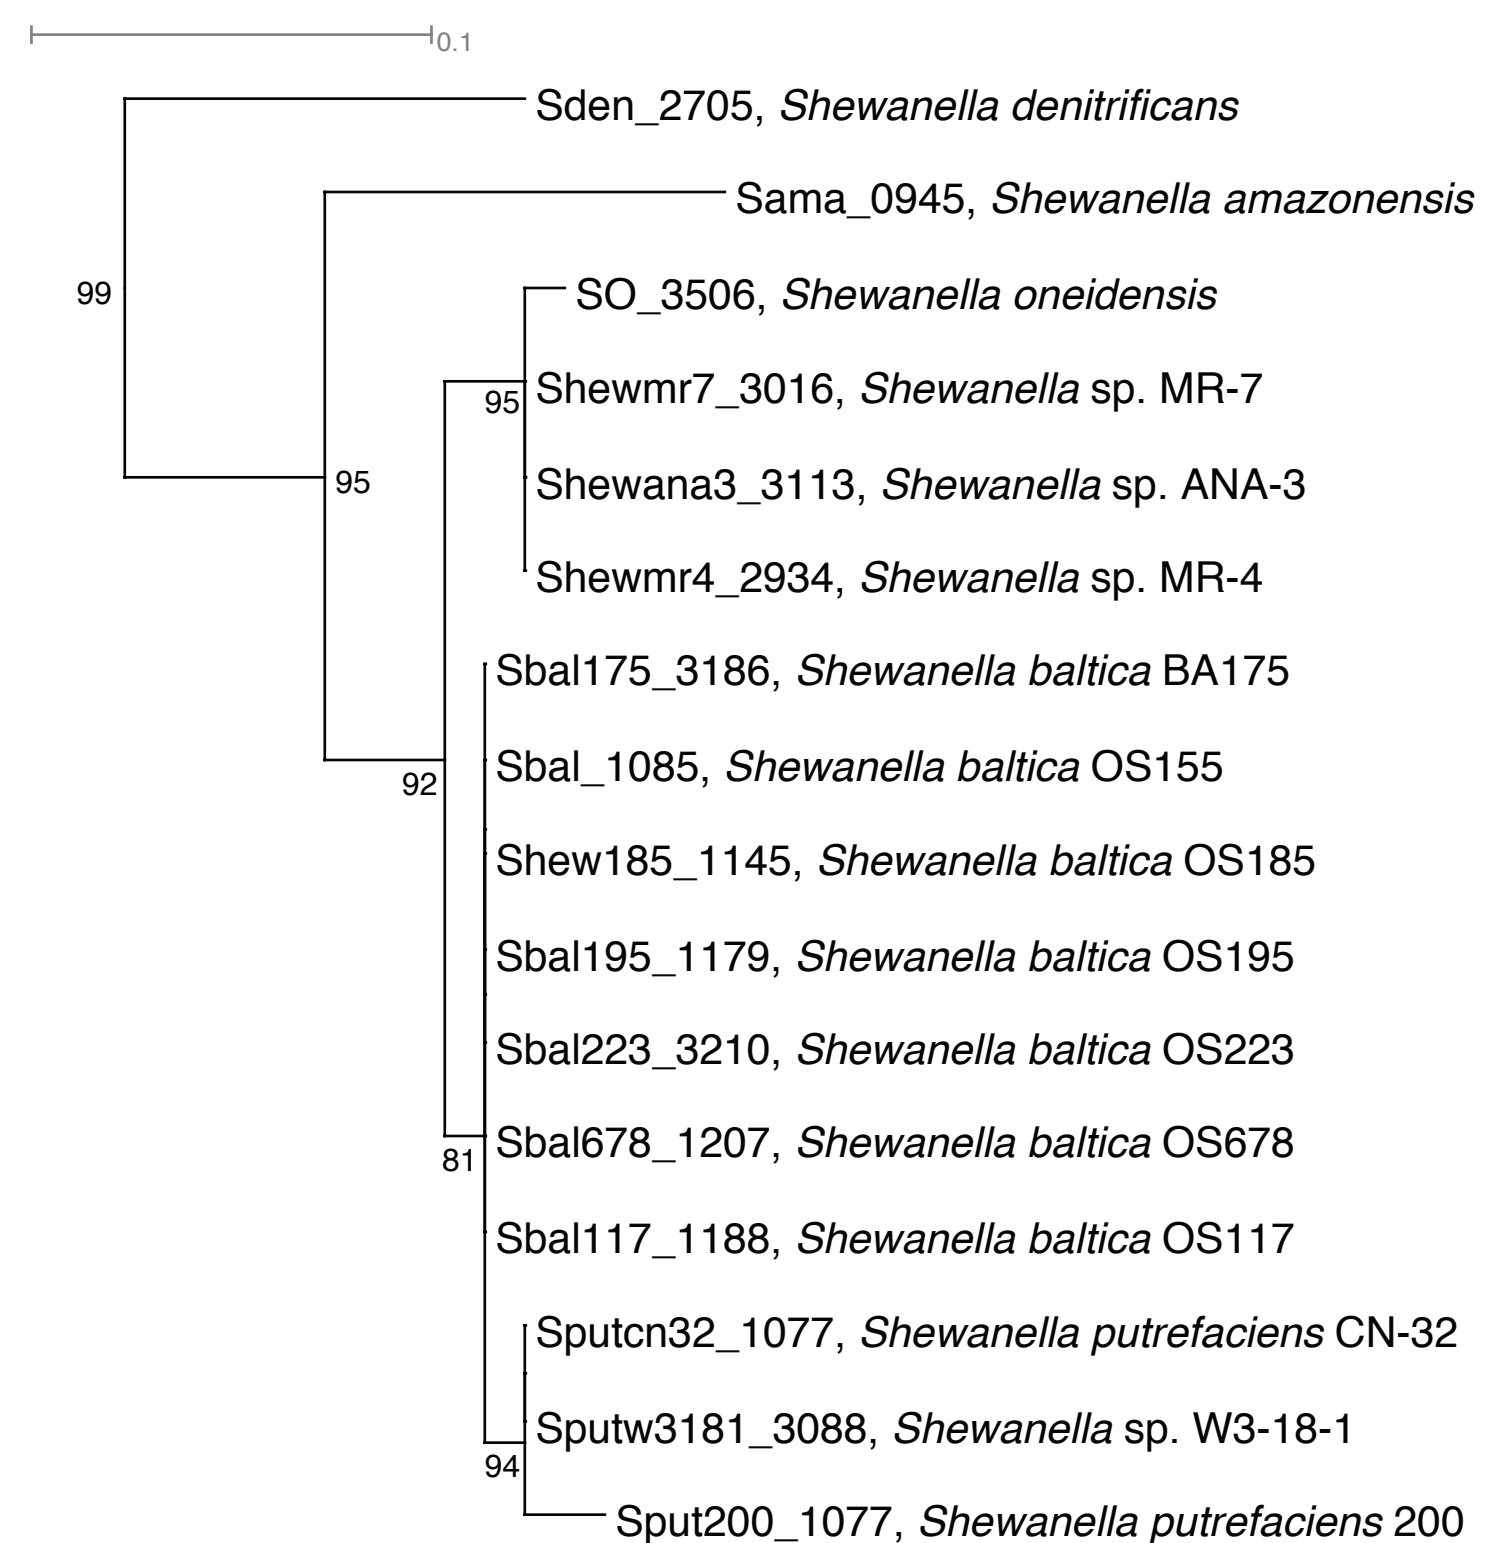

Supplement: inline-supplementary-material-4 [file inline-supplementary-material-4.pdf]
